# Supplementary material for: Direct Flavonoid-Focused Chemical Comparison among Three Epimedium Plants by Online Liquid Extraction–High Performance Liquid Chromatography–Tandem Mass Spectrometry
Source: PubMed Central journal article supplement (PMC7998785; doi:10.3390/molecules26061520), 2021-03-10
Supplement: molecules-26-01520-s001.pdf [file molecules-26-01520-s001.pdf]

## Supporting Information

# Direct Flavonoid-Focused Chemical Comparison Among Three *Epimedium* Plants by Online Liquid Extraction–High Performance Liquid Chromatography–Tandem Mass Spectrometry

Xia Xu <sup>1</sup>, Ting Li <sup>1</sup>, Ke Zhang <sup>1</sup>, Yan Cao <sup>1</sup>, Li Liu <sup>2</sup>, Shilin Zhang <sup>2</sup>, Pengfei Tu <sup>1</sup>, Yuelin Song <sup>1</sup>, Yunfang Zhao <sup>1,\*</sup> and Jun Li <sup>1,\*</sup>

<sup>1</sup> Modern Research Center for Traditional Chinese Medicine, School of Chinese Materia Medica, Beijing University of Chinese Medicine, Beijing 100029, China; Xkilly1119@163.com (X.X.); 18201353145@163.com (T.L.); zk\_5353@163.com (K.Z.); cyan199409@163.com (Y.C.); pengfeitu@163.com (P.T.); syltvc2005@163.com (Y.S.)

<sup>2</sup> Guizhou Hanfang Pharmaceutical Co. Ltd., Guiyang 550014, China; dcxliuli@163.com (L.L.); zhang\_shi\_lin2021@163.com (S.Z.)

\* Correspondence: yunfang.zhao@163.com (Y.Z.); [drlij666@163.com](mailto:drlij666@163.com) (J.L.); Tel./Fax.: +86-010-6428-6350 (Y.Z.)

**Table S1. The in-house data library for the chemical components identified from *Epimedium* genus.**

| No. | Molecular formula                              | Exact Mass | Integer/Da | Mass defect/ mDa | Identity                                                                                                                                           | Reference |
|-----|------------------------------------------------|------------|------------|------------------|----------------------------------------------------------------------------------------------------------------------------------------------------|-----------|
| 1   | C <sub>13</sub> H <sub>8</sub> O <sub>6</sub>  | 260.0321   | 260        | 32.10            | 1,3,5,8-tetrahydroxy xanthone                                                                                                                      | 1         |
| 2   | C <sub>15</sub> H <sub>12</sub> O <sub>4</sub> | 256.0736   | 256        | 73.60            | liquiritigenin                                                                                                                                     | 2         |
| 3   | C <sub>15</sub> H <sub>12</sub> O <sub>4</sub> | 256.0736   | 256        | 73.60            | isoliquiritigenin                                                                                                                                  | 3         |
| 4   | C <sub>15</sub> H <sub>10</sub> O <sub>5</sub> | 270.0528   | 270        | 52.80            | apigenin                                                                                                                                           | 4         |
| 5   | C <sub>15</sub> H <sub>10</sub> O <sub>6</sub> | 286.0477   | 286        | 47.70            | kaempferol                                                                                                                                         | 5         |
| 6   | C <sub>15</sub> H <sub>10</sub> O <sub>6</sub> | 286.0477   | 286        | 47.70            | luteolin                                                                                                                                           | 5         |
| 7   | C <sub>16</sub> H <sub>12</sub> O <sub>6</sub> | 300.0634   | 300        | 63.40            | 6-demethoxy-7-methylcapillarisin                                                                                                                   | 6         |
| 8   | C <sub>16</sub> H <sub>12</sub> O <sub>6</sub> | 300.0634   | 300        | 63.40            | chrysoeriol                                                                                                                                        | 7         |
| 9   | C <sub>15</sub> H <sub>10</sub> O <sub>7</sub> | 302.0427   | 302        | 42.70            | quercetin                                                                                                                                          | 5         |
| 10  | C <sub>16</sub> H <sub>14</sub> O <sub>6</sub> | 302.0790   | 302        | 79.00            | 1-hydroxy-3,5,8-trimethoxy xanthone                                                                                                                | 1         |
| 11  | C <sub>16</sub> H <sub>12</sub> O <sub>7</sub> | 316.0583   | 316        | 58.30            | tricetin-3'-methyl ether                                                                                                                           | 2         |
| 12  | C <sub>17</sub> H <sub>14</sub> O <sub>7</sub> | 330.0740   | 330        | 74.00            | tricin                                                                                                                                             | 8         |
| 13  | C <sub>18</sub> H <sub>14</sub> O <sub>7</sub> | 330.0740   | 330        | 74.00            | 5-hydroxy-6,7-methylene-dioxyflavone                                                                                                               | 9         |
| 14  | C <sub>20</sub> H <sub>16</sub> O <sub>5</sub> | 336.0998   | 336        | 99.80            | yinyanghuo C                                                                                                                                       | 10        |
| 15  | C <sub>20</sub> H <sub>16</sub> O <sub>5</sub> | 336.0998   | 336        | 99.80            | yinyanghuo E                                                                                                                                       | 10        |
| 16  | C <sub>20</sub> H <sub>18</sub> O <sub>5</sub> | 338.1154   | 338        | 115.40           | yinyanghuo D                                                                                                                                       | 10        |
| 17  | C <sub>20</sub> H <sub>16</sub> O <sub>6</sub> | 352.0947   | 352        | 94.70            | epimedonin B                                                                                                                                       | 10        |
| 18  | C <sub>21</sub> H <sub>20</sub> O <sub>5</sub> | 352.1311   | 352        | 131.10           | 8-(3,3-dimethylallyl)-5,7-dihydroxy-4'-methoxyflavonol 3-[O-3,5-di-deoxy-2-C-(ethoxycarbonyl)-β-D-erythropentofuranosyl-(1→2)-α-L-rha] 7-(β-D-glc) | 2         |
| 19  | C <sub>20</sub> H <sub>18</sub> O <sub>6</sub> | 354.1103   | 354        | 110.30           | demethylanhydroicaritin                                                                                                                            | 4         |
| 20  | C <sub>20</sub> H <sub>18</sub> O <sub>6</sub> | 354.1103   | 354        | 110.30           | 2-(p-hydroxyphenoxy)-5, 7-dihydroxy-6-isopentenyl chromone                                                                                         | 11        |
| 21  | C <sub>20</sub> H <sub>18</sub> O <sub>6</sub> | 354.1103   | 354        | 110.30           | epimedokoreanin D                                                                                                                                  | 12        |
| 22  | C <sub>20</sub> H <sub>18</sub> O <sub>6</sub> | 354.1103   | 354        | 110.30           | 8-prenylkaempferol                                                                                                                                 | 13        |
| 23  | C <sub>20</sub> H <sub>18</sub> O <sub>6</sub> | 354.1103   | 354        | 110.30           | 6-demthoxy-7-isopentenylcapillarisin                                                                                                               | 6         |
| 24  | C <sub>20</sub> H <sub>18</sub> O <sub>6</sub> | 354.1103   | 354        | 110.30           | aglycone A                                                                                                                                         | 14        |
| 25  | C <sub>21</sub> H <sub>20</sub> O <sub>6</sub> | 368.1260   | 368        | 126.00           | epimedokoreanin D                                                                                                                                  | 2         |
| 26  | C <sub>21</sub> H <sub>20</sub> O <sub>6</sub> | 368.1260   | 368        | 126.00           | anhydroicaritin                                                                                                                                    | 2         |
| 27  | C <sub>21</sub> H <sub>20</sub> O <sub>6</sub> | 368.1260   | 368        | 126.00           | epimedonin A                                                                                                                                       | 15        |
| 28  | C <sub>21</sub> H <sub>22</sub> O <sub>6</sub> | 370.1416   | 370        | 141.60           | 6-demethoxy-4'-methyl-8-isopentenylcapillarisin                                                                                                    | 6         |
| 29  | C <sub>21</sub> H <sub>20</sub> O <sub>7</sub> | 384.1209   | 384        | 120.90           | aglycone C                                                                                                                                         | 14        |
| 30  | C <sub>21</sub> H <sub>20</sub> O <sub>7</sub> | 384.1209   | 384        | 120.90           | 2''-hydroxy-β-anhydroicaritin                                                                                                                      | 2         |
| 31  | C <sub>21</sub> H <sub>22</sub> O <sub>7</sub> | 384.1209   | 384        | 120.90           | wushanicaritin                                                                                                                                     | 16        |

|    |                                                 |          |     |        |                                                     |    |
|----|-------------------------------------------------|----------|-----|--------|-----------------------------------------------------|----|
| 32 | C <sub>21</sub> H <sub>22</sub> O <sub>7</sub>  | 384.1209 | 384 | 120.90 | 5,7-dihydroxy-2-(p-hydroxyphenoxy)-6-prenyichromone | 17 |
| 33 | C <sub>22</sub> H <sub>22</sub> O <sub>7</sub>  | 398.1366 | 398 | 136.60 | baohuosu                                            | 18 |
| 34 | C <sub>22</sub> H <sub>24</sub> O <sub>7</sub>  | 400.1522 | 400 | 152.20 | brevicommin                                         | 19 |
| 35 | C <sub>22</sub> H <sub>30</sub> O <sub>7</sub>  | 406.1992 | 406 | 199.20 | 3''-ethoxylicartin                                  | 20 |
| 36 | C <sub>25</sub> H <sub>26</sub> O <sub>5</sub>  | 406.1780 | 406 | 178.00 | 5,7,4-trihydroxy-8,3-diprenylflavone                | 21 |
| 37 | C <sub>25</sub> H <sub>26</sub> O <sub>5</sub>  | 406.1780 | 406 | 178.00 | 4'5,7-trihydroxy-5',8-di isopentenyl-flavone        | 3  |
| 38 | C <sub>25</sub> H <sub>22</sub> O <sub>6</sub>  | 418.1416 | 418 | 141.60 | epimedonin E                                        | 22 |
| 39 | C <sub>25</sub> H <sub>24</sub> O <sub>6</sub>  | 420.1573 | 420 | 157.30 | yinyanghuo A                                        | 10 |
| 40 | C <sub>25</sub> H <sub>24</sub> O <sub>6</sub>  | 420.1573 | 420 | 157.30 | epimedonin C                                        | 22 |
| 41 | C <sub>25</sub> H <sub>24</sub> O <sub>6</sub>  | 420.1573 | 420 | 157.30 | epimedonin F                                        | 22 |
| 42 | C <sub>25</sub> H <sub>26</sub> O <sub>6</sub>  | 422.1729 | 422 | 172.90 | yinyanghuo B                                        | 10 |
| 43 | C <sub>25</sub> H <sub>26</sub> O <sub>6</sub>  | 422.1729 | 422 | 172.90 | epimedokoreanin B                                   | 3  |
| 44 | C <sub>25</sub> H <sub>26</sub> O <sub>6</sub>  | 422.1729 | 422 | 172.90 | broussoflavonol F                                   | 3  |
| 45 | C <sub>21</sub> H <sub>20</sub> O <sub>10</sub> | 432.1056 | 432 | 105.60 | kaempferol-3-O- $\alpha$ -rha                       | 18 |
| 46 | C <sub>26</sub> H <sub>28</sub> O <sub>6</sub>  | 436.1886 | 436 | 188.60 | epimedonin D                                        | 15 |
| 47 | C <sub>25</sub> H <sub>26</sub> O <sub>7</sub>  | 438.1679 | 438 | 167.90 | breviflavone A                                      | 23 |
| 48 | C <sub>25</sub> H <sub>26</sub> O <sub>7</sub>  | 438.1679 | 438 | 167.90 | breviflavone B                                      | 23 |
| 49 | C <sub>25</sub> H <sub>26</sub> O <sub>7</sub>  | 438.1679 | 438 | 167.90 | desmethylicartin                                    | 20 |
| 50 | C <sub>21</sub> H <sub>20</sub> O <sub>11</sub> | 448.1006 | 448 | 100.60 | quercetin -3-O- rha                                 | 24 |
| 51 | C <sub>21</sub> H <sub>20</sub> O <sub>11</sub> | 448.1006 | 448 | 100.60 | astragalin                                          | 25 |
| 52 | C <sub>21</sub> H <sub>20</sub> O <sub>11</sub> | 448.1006 | 448 | 100.60 | trifolin                                            | 18 |
| 53 | C <sub>21</sub> H <sub>20</sub> O <sub>11</sub> | 448.1006 | 448 | 100.60 | kaempferol-3-O-gal                                  | 3  |
| 54 | C <sub>21</sub> H <sub>20</sub> O <sub>11</sub> | 448.1006 | 448 | 100.60 | kaempferol-7-O-glc                                  | 3  |
| 55 | C <sub>21</sub> H <sub>20</sub> O <sub>11</sub> | 448.1006 | 448 | 100.60 | quercetin-3-O-rha                                   | 3  |
| 56 | C <sub>25</sub> H <sub>24</sub> O <sub>8</sub>  | 452.1471 | 452 | 147.10 | epimedokoreanin A                                   | 2  |
| 57 | C <sub>25</sub> H <sub>26</sub> O <sub>8</sub>  | 454.1628 | 454 | 162.80 | epimedokoreanin C                                   | 26 |
| 58 | C <sub>21</sub> H <sub>20</sub> O <sub>12</sub> | 464.0955 | 464 | 95.50  | hyperoside                                          | 24 |
| 59 | C <sub>21</sub> H <sub>22</sub> O <sub>12</sub> | 464.0955 | 464 | 95.50  | dihydroquercetin-7-O-glc                            | 24 |
| 60 | C <sub>21</sub> H <sub>20</sub> O <sub>12</sub> | 464.0955 | 464 | 95.50  | hyperoside                                          | 3  |
| 61 | C <sub>21</sub> H <sub>20</sub> O <sub>12</sub> | 464.0955 | 464 | 95.50  | quercetin-3-O-gal                                   | 3  |
| 62 | C <sub>21</sub> H <sub>20</sub> O <sub>12</sub> | 464.0955 | 464 | 95.50  | quercetin-7-O-glc                                   | 3  |
| 63 | C <sub>21</sub> H <sub>20</sub> O <sub>13</sub> | 480.0904 | 480 | 90.40  | isoarbayonin                                        | 18 |
| 64 | C <sub>21</sub> H <sub>20</sub> O <sub>13</sub> | 480.0904 | 480 | 90.40  | myricetin-3-O-glc                                   | 3  |
| 65 | C <sub>26</sub> H <sub>26</sub> O <sub>10</sub> | 498.1526 | 498 | 152.60 | icarisoside E                                       | 27 |
| 66 | C <sub>26</sub> H <sub>28</sub> O <sub>10</sub> | 500.1682 | 500 | 168.20 | baohuoside II                                       | 25 |
| 67 | C <sub>26</sub> H <sub>28</sub> O <sub>10</sub> | 500.1682 | 500 | 168.20 | ikarisoside A                                       | 18 |
| 68 | C <sub>26</sub> H <sub>28</sub> O <sub>10</sub> | 500.1682 | 500 | 168.20 | demethylanhydroicaritin-3-O-rha                     | 3  |
| 69 | C <sub>27</sub> H <sub>28</sub> O <sub>10</sub> | 512.1682 | 512 | 168.20 | acuminatoside                                       | 2  |
| 70 | C <sub>27</sub> H <sub>30</sub> O <sub>10</sub> | 514.1839 | 514 | 183.90 | baohuoside I                                        | 3  |
| 71 | C <sub>27</sub> H <sub>30</sub> O <sub>10</sub> | 514.1839 | 514 | 183.90 | icariside II                                        | 3  |
| 72 | C <sub>27</sub> H <sub>30</sub> O <sub>10</sub> | 514.1839 | 514 | 183.90 | anhydroicaritin-3-O-rha                             | 3  |
| 73 | C <sub>26</sub> H <sub>28</sub> O <sub>11</sub> | 516.1632 | 516 | 163.20 | epimedeside C                                       | 18 |
| 74 | C <sub>26</sub> H <sub>28</sub> O <sub>11</sub> | 516.1632 | 516 | 163.20 | demethylanhydroicaritin-7-O-glc                     | 3  |
| 75 | C <sub>26</sub> H <sub>30</sub> O <sub>11</sub> | 518.1788 | 518 | 178.80 | dihydrodemethylicartin-7-O-glc                      | 3  |
| 76 | C <sub>27</sub> H <sub>28</sub> O <sub>11</sub> | 528.1632 | 528 | 163.20 |                                                     | 28 |
| 77 | C <sub>27</sub> H <sub>30</sub> O <sub>11</sub> | 530.1788 | 530 | 178.80 | caohuoside C                                        | 18 |
| 78 | C <sub>27</sub> H <sub>30</sub> O <sub>11</sub> | 530.1788 | 530 | 178.80 | icariside I                                         | 24 |
| 79 | C <sub>27</sub> H <sub>30</sub> O <sub>11</sub> | 530.1788 | 530 | 178.80 | wushan icariin                                      | 2  |
| 80 | C <sub>27</sub> H <sub>30</sub> O <sub>11</sub> | 530.1788 | 530 | 178.80 | caohuoside D                                        | 29 |
| 81 | C <sub>27</sub> H <sub>30</sub> O <sub>11</sub> | 530.1788 | 530 | 178.80 | koreanoside E                                       | 30 |
| 82 | C <sub>27</sub> H <sub>30</sub> O <sub>11</sub> | 530.1788 | 530 | 178.80 | anhydroicaritin-7-O-glc or isomer                   | 3  |
| 83 | C <sub>27</sub> H <sub>30</sub> O <sub>11</sub> | 530.1788 | 530 | 178.80 | 3'-hydroxyicariine-7-O-rha or isomer                | 3  |
| 84 | C <sub>27</sub> H <sub>30</sub> O <sub>11</sub> | 530.1788 | 530 | 178.80 | icariin I                                           | 25 |
| 85 | C <sub>26</sub> H <sub>28</sub> O <sub>12</sub> | 532.1581 | 532 | 158.10 |                                                     | 31 |
| 86 | C <sub>27</sub> H <sub>32</sub> O <sub>11</sub> | 532.1945 | 532 | 194.50 | icaritin-3-O-rha or isomer                          | 24 |
| 87 | C <sub>28</sub> H <sub>30</sub> O <sub>11</sub> | 542.1788 | 542 | 178.80 | ikarisoside D                                       | 27 |
| 88 | C <sub>27</sub> H <sub>30</sub> O <sub>12</sub> | 546.1737 | 546 | 173.70 | 3'-hydroxyicariine-3-O-glc                          | 3  |
| 89 | C <sub>27</sub> H <sub>32</sub> O <sub>12</sub> | 548.1894 | 548 | 189.40 | maohuoside A                                        | 2  |
| 90 | C <sub>27</sub> H <sub>34</sub> O <sub>12</sub> | 550.2050 | 550 | 205.00 | acumination                                         | 32 |
| 91 | C <sub>31</sub> H <sub>20</sub> O <sub>10</sub> | 552.1056 | 552 | 105.60 | bilobetin                                           | 17 |
| 92 | C <sub>29</sub> H <sub>32</sub> O <sub>11</sub> | 556.1945 | 556 | 194.50 | anhydroicaritin-3-O-rha(OAc)                        | 3  |

|     |                                                 |          |     |        |                                                                                 |    |
|-----|-------------------------------------------------|----------|-----|--------|---------------------------------------------------------------------------------|----|
| 93  | C <sub>29</sub> H <sub>32</sub> O <sub>11</sub> | 556.1945 | 556 | 194.50 | anhydroicaritin-3-O-rha(OAc) isomer                                             | 3  |
| 94  | C <sub>28</sub> H <sub>34</sub> O <sub>12</sub> | 562.2050 | 562 | 205.00 | caohuoside D                                                                    | 2  |
| 95  | C <sub>28</sub> H <sub>34</sub> O <sub>12</sub> | 562.2050 | 562 | 205.00 | caohuoside F                                                                    | 2  |
| 96  | C <sub>26</sub> H <sub>28</sub> O <sub>14</sub> | 564.1479 | 564 | 147.90 | kaempferol-7-O-rha-xyl                                                          | 3  |
| 97  | C <sub>32</sub> H <sub>22</sub> O <sub>10</sub> | 566.1213 | 566 | 121.30 | ginkgetin                                                                       | 17 |
| 98  | C <sub>32</sub> H <sub>22</sub> O <sub>10</sub> | 566.1213 | 566 | 121.30 | isoginkgetin                                                                    | 17 |
| 99  | C <sub>27</sub> H <sub>30</sub> O <sub>14</sub> | 578.1636 | 578 | 163.60 | kaempferol -3-O-di-rha                                                          | 24 |
| 100 | C <sub>27</sub> H <sub>30</sub> O <sub>14</sub> | 578.1636 | 578 | 163.60 | kaempferitrin                                                                   | 18 |
| 101 | C <sub>27</sub> H <sub>30</sub> O <sub>14</sub> | 578.1636 | 578 | 163.60 | sempervirenside B                                                               | 33 |
| 102 | C <sub>27</sub> H <sub>30</sub> O <sub>14</sub> | 578.1636 | 578 | 163.60 | kaempferol-3-O-rha-7-O-rha                                                      | 3  |
| 103 | C <sub>27</sub> H <sub>30</sub> O <sub>14</sub> | 578.1636 | 578 | 163.60 | kaempferol-3-O-rha-rha                                                          | 3  |
| 104 | C <sub>26</sub> H <sub>28</sub> O <sub>15</sub> | 580.1428 | 580 | 142.80 | quercetin-3-O-rha-xyl                                                           | 3  |
| 105 | C <sub>28</sub> H <sub>36</sub> O <sub>13</sub> | 580.2156 | 580 | 215.60 | icariside E7                                                                    | 4  |
| 106 | C <sub>31</sub> H <sub>36</sub> O <sub>11</sub> | 584.2258 | 584 | 225.80 | 3',4',5,7-tetrahydroxy-5',8-diisopentenyl-flavone-7-O-glc or brousoflavonol F   | 3  |
| 107 | C <sub>27</sub> H <sub>30</sub> O <sub>15</sub> | 594.1585 | 594 | 158.50 | quercetin-3,7-O-di-rha                                                          | 24 |
| 108 | C <sub>27</sub> H <sub>30</sub> O <sub>15</sub> | 594.1585 | 594 | 158.50 | quercetin-3-O-glc-7-O-rha                                                       | 3  |
| 109 | C <sub>29</sub> H <sub>32</sub> O <sub>15</sub> | 620.1741 | 620 | 174.10 | sutchuenoside A                                                                 | 34 |
| 110 | C <sub>29</sub> H <sub>32</sub> O <sub>15</sub> | 620.1741 | 620 | 174.10 | kaempferol-3-O-rha-7-O-rha(OAc)                                                 | 3  |
| 111 | C <sub>29</sub> H <sub>34</sub> O <sub>15</sub> | 622.1898 | 622 | 189.80 | wushanicariin                                                                   | 35 |
| 112 | C <sub>31</sub> H <sub>36</sub> O <sub>14</sub> | 632.2105 | 632 | 210.50 | icarisoside F                                                                   | 25 |
| 113 | C <sub>31</sub> H <sub>36</sub> O <sub>14</sub> | 632.2105 | 632 | 210.50 | demethylanhydroicaritin-3-O-rhamnopyranosyl-xylopyranoside                      | 24 |
| 114 | C <sub>33</sub> H <sub>36</sub> O <sub>13</sub> | 640.2156 | 640 | 215.60 |                                                                                 | 28 |
| 115 | C <sub>32</sub> H <sub>34</sub> O <sub>14</sub> | 642.1949 | 642 | 194.90 | demethylanhydroicaritin-3-O-rha-dideoxyfuranose                                 | 3  |
| 116 | C <sub>32</sub> H <sub>38</sub> O <sub>14</sub> | 646.2262 | 646 | 226.20 | 2''-O-rhamnopyranosylkariside A                                                 | 2  |
| 117 | C <sub>32</sub> H <sub>38</sub> O <sub>14</sub> | 646.2262 | 646 | 226.20 | baohuoside III                                                                  | 36 |
| 118 | C <sub>32</sub> H <sub>38</sub> O <sub>14</sub> | 646.2262 | 646 | 226.20 | baohuoside IV                                                                   | 36 |
| 119 | C <sub>32</sub> H <sub>38</sub> O <sub>14</sub> | 646.2262 | 646 | 226.20 | sagittatoside B                                                                 | 3  |
| 120 | C <sub>32</sub> H <sub>38</sub> O <sub>14</sub> | 646.2262 | 646 | 226.20 | anhydroicaritin-3-O-rha-(1-2)-xyl                                               | 3  |
| 121 | C <sub>32</sub> H <sub>38</sub> O <sub>14</sub> | 646.2262 | 646 | 226.20 | demethylanhydroicaritin-3-O-rha-(1-2)rha                                        | 3  |
| 122 | C <sub>31</sub> H <sub>36</sub> O <sub>15</sub> | 648.2054 | 648 | 205.40 | demethylanhydroicaritin-3-O-glc(1-2)xyl                                         | 3  |
| 123 | C <sub>33</sub> H <sub>36</sub> O <sub>14</sub> | 656.2105 | 656 | 210.50 | sutchuenmedin B                                                                 | 34 |
| 124 | C <sub>33</sub> H <sub>38</sub> O <sub>14</sub> | 658.2262 | 658 | 226.20 | anhydroicaritin-3-O-rhamnopyranosyl-furan acid or isomer                        | 24 |
| 125 | C <sub>33</sub> H <sub>38</sub> O <sub>14</sub> | 658.2262 | 658 | 226.20 | sutchuenmedin A                                                                 | 37 |
| 126 | C <sub>33</sub> H <sub>38</sub> O <sub>14</sub> | 658.2262 | 658 | 226.20 |                                                                                 | 28 |
| 127 | C <sub>33</sub> H <sub>38</sub> O <sub>14</sub> | 658.2262 | 658 | 226.20 |                                                                                 | 31 |
| 128 | C <sub>33</sub> H <sub>40</sub> O <sub>14</sub> | 660.2418 | 660 | 241.80 | 2''-O-rhamnosyl icariside II                                                    | 24 |
| 129 | C <sub>33</sub> H <sub>40</sub> O <sub>14</sub> | 660.2418 | 660 | 241.80 | 2''-O-rhamnosyl icarisideII isomer                                              | 24 |
| 130 | C <sub>33</sub> H <sub>40</sub> O <sub>14</sub> | 660.2418 | 660 | 241.80 | anhydroicaritin-3-O-rha-(1-2)-rha                                               | 3  |
| 131 | C <sub>33</sub> H <sub>40</sub> O <sub>14</sub> | 660.2418 | 660 | 241.80 | anhydroicaritin-3-O-rha-7-O-rha                                                 | 3  |
| 132 | C <sub>32</sub> H <sub>38</sub> O <sub>15</sub> | 662.2211 | 662 | 221.10 | epimedeside A                                                                   | 24 |
| 133 | C <sub>32</sub> H <sub>38</sub> O <sub>15</sub> | 662.2211 | 662 | 221.10 | icarisoside B or isomer                                                         | 25 |
| 134 | C <sub>32</sub> H <sub>38</sub> O <sub>15</sub> | 662.2211 | 662 | 221.10 | ikarisoside B                                                                   | 25 |
| 135 | C <sub>32</sub> H <sub>38</sub> O <sub>15</sub> | 662.2211 | 662 | 221.10 | epimedeside A                                                                   | 18 |
| 136 | C <sub>32</sub> H <sub>38</sub> O <sub>15</sub> | 662.2211 | 662 | 221.10 | demethylanhydroicaritin-3-O-rha-(1-2)glc or isomer                              | 3  |
| 137 | C <sub>32</sub> H <sub>38</sub> O <sub>15</sub> | 662.2211 | 662 | 221.10 | demethylanhydroicaritin-3-O-rha-7-O-glc or isomer                               | 3  |
| 138 | C <sub>32</sub> H <sub>38</sub> O <sub>15</sub> | 662.2211 | 662 | 221.10 | 3'-hydroxycariine-3-O-rha-xyl                                                   | 3  |
| 139 | C <sub>32</sub> H <sub>38</sub> O <sub>15</sub> | 662.2211 | 662 | 221.10 | 3'-hydroxycariine-7-O-rha-xyl or isomer                                         | 3  |
| 140 | C <sub>33</sub> H <sub>38</sub> O <sub>15</sub> | 674.2211 | 674 | 221.10 | 4, 5, 7-trihydroxyl-8-(3, 3-dimethylallyl)-flavonol 3-O-xyl (1→3)-4-Oacetyl-rha | 2  |
| 141 | C <sub>33</sub> H <sub>38</sub> O <sub>15</sub> | 674.2211 | 674 | 221.10 | anhydroicaritin-3-o-rha-(1-4)-dideoxyfuranose-7-O-glc                           | 3  |
| 142 | C <sub>33</sub> H <sub>38</sub> O <sub>15</sub> | 674.2211 | 674 | 221.10 | anhydroicaritin-3-O-rha-(1-2)-dideoxyfuranose-7-O-glc                           | 3  |
| 143 | C <sub>33</sub> H <sub>40</sub> O <sub>15</sub> | 676.2367 | 676 | 236.70 | icariin                                                                         | 2  |
| 144 | C <sub>33</sub> H <sub>40</sub> O <sub>15</sub> | 676.2367 | 676 | 236.70 | 3'-hydroxycariine-3-di-O-rha                                                    | 24 |
| 145 | C <sub>33</sub> H <sub>40</sub> O <sub>15</sub> | 676.2367 | 676 | 236.70 | baohuoside VII                                                                  | 24 |

|     |                                                 |          |     |        |                                                                                   |    |
|-----|-------------------------------------------------|----------|-----|--------|-----------------------------------------------------------------------------------|----|
| 146 | C <sub>33</sub> H <sub>40</sub> O <sub>15</sub> | 676.2367 | 676 | 236.70 | sagittatocide A                                                                   | 24 |
| 147 | C <sub>33</sub> H <sub>40</sub> O <sub>15</sub> | 676.2367 | 676 | 236.70 | baohuoside VII                                                                    | 24 |
| 148 | C <sub>33</sub> H <sub>40</sub> O <sub>15</sub> | 676.2367 | 676 | 236.70 | 4-methoxyl-3, 5, 7-trihydroxyl-8-(3, 3- dimethylallyl)-flavonol 3-O-rha (1→2)-rha | 2  |
| 149 | C <sub>33</sub> H <sub>40</sub> O <sub>15</sub> | 676.2367 | 676 | 236.70 | sagittasine C                                                                     | 38 |
| 150 | C <sub>33</sub> H <sub>40</sub> O <sub>15</sub> | 676.2367 | 676 | 236.70 | anhydroicaritin-3-O-rha-glc                                                       | 3  |
| 151 | C <sub>33</sub> H <sub>40</sub> O <sub>15</sub> | 676.2367 | 676 | 236.70 | 3'-hydroxyicariine-3-O-rha-rha                                                    | 3  |
| 152 | C <sub>33</sub> H <sub>40</sub> O <sub>15</sub> | 676.2367 | 676 | 236.70 | 3''-hydroxyicariine-3-O-rha-7-O-rha or isomer                                     | 3  |
| 153 | C <sub>32</sub> H <sub>38</sub> O <sub>16</sub> | 678.2160 | 678 | 216.00 | dihydroanhydroicaritin-3-O-rha-7-O-glc                                            | 24 |
| 154 | C <sub>32</sub> H <sub>38</sub> O <sub>16</sub> | 678.2160 | 678 | 216.00 | hexandraside E or isomer                                                          | 24 |
| 155 | C <sub>32</sub> H <sub>38</sub> O <sub>16</sub> | 678.2160 | 678 | 216.00 | hexandraside E                                                                    | 18 |
| 156 | C <sub>32</sub> H <sub>38</sub> O <sub>16</sub> | 678.2160 | 678 | 216.00 | 4, 5-dihydroxyl-8-(3, 3-dimethylallyl)-flavonol 3-O-[xyl (1→3)-rha]-7-O-glc       | 2  |
| 157 | C <sub>32</sub> H <sub>38</sub> O <sub>16</sub> | 678.2160 | 678 | 216.00 | 8-(3, 3-dimethylallyl)-4', 5, 7-trihydroxyflavonol 7-[O-β-D-glc-(1→2)-β-D-glc]    | 2  |
| 158 | C <sub>32</sub> H <sub>38</sub> O <sub>16</sub> | 678.2160 | 678 | 216.00 | demethylanhydroicaritin-3-O-glc-7-O-glc                                           | 3  |
| 159 | C <sub>32</sub> H <sub>38</sub> O <sub>16</sub> | 678.2160 | 678 | 216.00 | dihydrodemethylanhydroicaritin-7-O-sophoroside                                    | 3  |
| 160 | C <sub>33</sub> H <sub>42</sub> O <sub>15</sub> | 678.2524 | 678 | 252.40 | wanepimedeside A                                                                  | 2  |
| 161 | C <sub>32</sub> H <sub>40</sub> O <sub>16</sub> | 680.2316 | 680 | 231.60 | dihydrodemethylicaritin-7-O-glc-glc                                               | 3  |
| 162 | C <sub>34</sub> H <sub>40</sub> O <sub>15</sub> | 688.2367 | 688 | 236.70 |                                                                                   | 28 |
| 163 | C <sub>33</sub> H <sub>38</sub> O <sub>16</sub> | 690.2160 | 690 | 216.00 |                                                                                   | 31 |
| 164 | C <sub>33</sub> H <sub>40</sub> O <sub>16</sub> | 692.2316 | 692 | 231.60 | sagittasine C                                                                     | 24 |
| 165 | C <sub>33</sub> H <sub>40</sub> O <sub>16</sub> | 692.2316 | 692 | 231.60 | anhydroicaritin-3,7-di-O-glc                                                      | 18 |
| 166 | C <sub>33</sub> H <sub>40</sub> O <sub>16</sub> | 692.2316 | 692 | 231.60 | kaempferin-3-O-α-rha                                                              | 4  |
| 167 | C <sub>33</sub> H <sub>40</sub> O <sub>16</sub> | 692.2316 | 692 | 231.60 | cuhuoside                                                                         | 2  |
| 168 | C <sub>33</sub> H <sub>40</sub> O <sub>16</sub> | 692.2316 | 692 | 231.60 | 3'-hydroxyicariine-3-O-rha-glc                                                    | 3  |
| 169 | C <sub>32</sub> H <sub>38</sub> O <sub>17</sub> | 694.2109 | 694 | 210.90 |                                                                                   | 31 |
| 170 | C <sub>32</sub> H <sub>38</sub> O <sub>17</sub> | 694.2109 | 694 | 210.90 |                                                                                   | 31 |
| 171 | C <sub>35</sub> H <sub>42</sub> O <sub>15</sub> | 702.2524 | 702 | 252.40 | acetylicariin                                                                     | 2  |
| 172 | C <sub>34</sub> H <sub>40</sub> O <sub>16</sub> | 704.2316 | 704 | 231.60 | demethylanhydroicaritin-3-O-rha(OAc)-glc                                          | 3  |
| 173 | C <sub>32</sub> H <sub>38</sub> O <sub>18</sub> | 710.2058 | 710 | 205.80 | kaempferol-3-O-rha-xyl-7-O-glc                                                    | 3  |
| 174 | C <sub>35</sub> H <sub>42</sub> O <sub>16</sub> | 718.2473 | 718 | 247.30 | sagittatocide C                                                                   | 3  |
| 175 | C <sub>35</sub> H <sub>42</sub> O <sub>16</sub> | 718.2473 | 718 | 247.30 | anhydroicaritin-3-O-glc(OAc)-7-O-rha                                              | 3  |
| 176 | C <sub>35</sub> H <sub>42</sub> O <sub>16</sub> | 718.2473 | 718 | 247.30 | anhydroicaritin-3-O-rha(OAc)-7-O-glc                                              | 3  |
| 177 | C <sub>34</sub> H <sub>40</sub> O <sub>17</sub> | 720.2266 | 720 | 226.60 |                                                                                   | 31 |
| 178 | C <sub>35</sub> H <sub>42</sub> O <sub>17</sub> | 734.2422 | 734 | 242.20 |                                                                                   | 28 |
| 179 | C <sub>35</sub> H <sub>42</sub> O <sub>17</sub> | 734.2422 | 734 | 242.20 |                                                                                   | 31 |
| 180 | C <sub>34</sub> H <sub>42</sub> O <sub>18</sub> | 738.2371 | 738 | 237.10 |                                                                                   | 14 |
| 181 | C <sub>33</sub> H <sub>40</sub> O <sub>19</sub> | 740.2164 | 740 | 216.40 | kaempferol-3-O-rha-glc-7-O-rha                                                    | 24 |
| 182 | C <sub>33</sub> H <sub>40</sub> O <sub>19</sub> | 740.2164 | 740 | 216.40 | kaempferol-3-O-rha-glc-7-O-glc                                                    | 3  |
| 183 | C <sub>36</sub> H <sub>42</sub> O <sub>17</sub> | 746.2422 | 746 | 242.20 | anhydroicaritin-3-O-xyl(2OAc)-7-O-glc                                             | 3  |
| 184 | C <sub>36</sub> H <sub>42</sub> O <sub>17</sub> | 746.2422 | 746 | 242.20 | demethylanhydroicaritin-3-O-rha(OAc)-glc(OAc)                                     | 3  |
| 185 | C <sub>37</sub> H <sub>44</sub> O <sub>17</sub> | 760.2579 | 760 | 257.90 | epimedeside                                                                       | 2  |
| 186 | C <sub>37</sub> H <sub>44</sub> O <sub>17</sub> | 760.2579 | 760 | 257.90 | anhydroicaritin-3-o-rha(1-4OAc)-glc(1-4OAc)                                       | 3  |
| 187 | C <sub>37</sub> H <sub>44</sub> O <sub>17</sub> | 760.2579 | 760 | 257.90 | korepimedeside A isomer                                                           | 39 |
| 188 | C <sub>36</sub> H <sub>42</sub> O <sub>18</sub> | 762.2371 | 762 | 237.10 |                                                                                   | 28 |
| 189 | C <sub>38</sub> H <sub>44</sub> O <sub>18</sub> | 788.2528 | 788 | 252.80 |                                                                                   | 31 |
| 190 | C <sub>37</sub> H <sub>46</sub> O <sub>19</sub> | 794.2633 | 794 | 263.30 | epimedeside D                                                                     | 40 |
| 191 | C <sub>37</sub> H <sub>46</sub> O <sub>19</sub> | 794.2633 | 794 | 263.30 | epimedeside E                                                                     | 24 |
| 192 | C <sub>37</sub> H <sub>46</sub> O <sub>19</sub> | 794.2633 | 794 | 263.30 |                                                                                   | 31 |
| 193 | C <sub>39</sub> H <sub>46</sub> O <sub>18</sub> | 802.2684 | 802 | 268.40 | korepimeoside A                                                                   | 39 |
| 194 | C <sub>39</sub> H <sub>46</sub> O <sub>18</sub> | 802.2684 | 802 | 268.40 | korepimeoside B                                                                   | 39 |
| 195 | C <sub>39</sub> H <sub>46</sub> O <sub>18</sub> | 802.2684 | 802 | 268.40 | anhydroicaritin-3-O-rha(OAc)-glc(2OAc)                                            | 3  |
| 196 | C <sub>39</sub> H <sub>46</sub> O <sub>18</sub> | 802.2684 | 802 | 268.40 | anhydroicaritin-3-O-rha(OAc)-glc(2OAc) isomer                                     | 3  |
| 197 | C <sub>38</sub> H <sub>46</sub> O <sub>19</sub> | 806.2633 | 806 | 263.30 |                                                                                   | 28 |
| 198 | C <sub>38</sub> H <sub>48</sub> O <sub>19</sub> | 808.2790 | 808 | 279.00 | diphyllside B                                                                     | 24 |
| 199 | C <sub>38</sub> H <sub>48</sub> O <sub>19</sub> | 808.2790 | 808 | 279.00 | diphyllside A                                                                     | 18 |

|     |                                                  |          |     |        |                                                                                                                                                                                  |    |
|-----|--------------------------------------------------|----------|-----|--------|----------------------------------------------------------------------------------------------------------------------------------------------------------------------------------|----|
| 200 | C <sub>38</sub> H <sub>48</sub> O <sub>19</sub>  | 808.2790 | 808 | 279.00 | epimedin B                                                                                                                                                                       | 4  |
| 201 | C <sub>38</sub> H <sub>48</sub> O <sub>19</sub>  | 808.2790 | 808 | 279.00 | baohuoside V                                                                                                                                                                     | 36 |
| 202 | C <sub>38</sub> H <sub>48</sub> O <sub>19</sub>  | 808.2790 | 808 | 279.00 | anhydroicaritin-3-O-rha-(1-4)-xyl-7-O-glc                                                                                                                                        | 3  |
| 203 | C <sub>38</sub> H <sub>48</sub> O <sub>19</sub>  | 808.2790 | 808 | 279.00 | demethylanhydroicaritin-3-O-rha-rha-7-O-glc                                                                                                                                      | 3  |
| 204 | C <sub>38</sub> H <sub>48</sub> O <sub>19</sub>  | 808.2790 | 808 | 279.00 | epimedin B isomer                                                                                                                                                                | 28 |
| 205 | C <sub>37</sub> H <sub>46</sub> O <sub>20</sub>  | 810.2582 | 810 | 258.20 |                                                                                                                                                                                  | 31 |
| 206 | C <sub>37</sub> H <sub>46</sub> O <sub>20</sub>  | 810.2582 | 810 | 258.20 |                                                                                                                                                                                  | 31 |
| 207 | C <sub>39</sub> H <sub>49</sub> NO <sub>18</sub> | 819.2950 | 819 | 295.00 | 3-acetyl-3,5,12-trihydroxy-10-methoxy-6,11-dioxo-1,2,3,4,6,11-hexahydro-1-tetracenyloxy-3,6-trideoxy-3-[[4-ethoxy-4-(β-D-glucopyranuronosyloxy)butyl]amino]-L-xyl-hexopyranoside | 18 |
| 208 | C <sub>39</sub> H <sub>49</sub> NO <sub>18</sub> | 819.2950 | 819 | 295.00 |                                                                                                                                                                                  | 14 |
| 209 | C <sub>39</sub> H <sub>48</sub> O <sub>19</sub>  | 820.2790 | 820 | 279.00 | anhydroicaritin-3-O-rha (1-2)-furan acid-7-O-glc                                                                                                                                 | 18 |
| 210 | C <sub>39</sub> H <sub>48</sub> O <sub>19</sub>  | 820.2790 | 820 | 279.00 | anhydroicaritin-3-O-rha-(1-3)-furan acid-7-O-glc                                                                                                                                 | 4  |
| 211 | C <sub>39</sub> H <sub>48</sub> O <sub>19</sub>  | 820.2790 | 820 | 279.00 | anhydroicaritin-3-O-rha (1-4) -furan acid-7-O-glc                                                                                                                                | 24 |
| 212 | C <sub>39</sub> H <sub>48</sub> O <sub>19</sub>  | 820.2790 | 820 | 279.00 | anhydroicaritin-3-O-glc (1-2) -furan acid-7-O-rha                                                                                                                                | 24 |
| 213 | C <sub>39</sub> H <sub>48</sub> O <sub>20</sub>  | 820.2790 | 820 | 279.00 | 4, 5-dihydroxyl-8-(3,3-dimethylallyl)-flavonol-3-O-[xyl (1→3)-4-O-acetyl-rha]-7-O-glc                                                                                            | 2  |
| 214 | C <sub>39</sub> H <sub>48</sub> O <sub>20</sub>  | 820.2790 | 820 | 279.00 | demethylanhydroicaritin-3-O-rha-xyl-7-O-glc(OAc)                                                                                                                                 | 3  |
| 215 | C <sub>39</sub> H <sub>50</sub> O <sub>19</sub>  | 822.2946 | 822 | 294.60 | baohuoside VI                                                                                                                                                                    | 25 |
| 216 | C <sub>38</sub> H <sub>46</sub> O <sub>20</sub>  | 822.2582 | 822 | 258.20 |                                                                                                                                                                                  | 14 |
| 217 | C <sub>39</sub> H <sub>50</sub> O <sub>19</sub>  | 822.2946 | 822 | 294.60 | baohuoside VI                                                                                                                                                                    | 18 |
| 218 | C <sub>39</sub> H <sub>50</sub> O <sub>19</sub>  | 822.2946 | 822 | 294.60 | epimedin C                                                                                                                                                                       | 4  |
| 219 | C <sub>39</sub> H <sub>50</sub> O <sub>19</sub>  | 822.2946 | 822 | 294.60 | hexandraside D                                                                                                                                                                   | 24 |
| 220 | C <sub>39</sub> H <sub>50</sub> O <sub>19</sub>  | 822.2946 | 822 | 294.60 | anhydroicaritin-3-O-rha-(1-4)-rha-7-O-glc                                                                                                                                        | 3  |
| 221 | C <sub>39</sub> H <sub>50</sub> O <sub>19</sub>  | 822.2946 | 822 | 294.60 | anhydroicaritin-3-O-rha-glc-7-O-rha                                                                                                                                              | 3  |
| 222 | C <sub>39</sub> H <sub>50</sub> O <sub>19</sub>  | 822.2946 | 822 | 294.60 | epimedin C isomer                                                                                                                                                                | 14 |
| 223 | C <sub>38</sub> H <sub>48</sub> O <sub>20</sub>  | 824.2739 | 824 | 273.90 | rouhuoside                                                                                                                                                                       | 24 |
| 224 | C <sub>38</sub> H <sub>48</sub> O <sub>20</sub>  | 824.2739 | 824 | 273.90 | diphyllaside B                                                                                                                                                                   | 18 |
| 225 | C <sub>38</sub> H <sub>48</sub> O <sub>20</sub>  | 824.2739 | 824 | 273.90 | ikarisoside C                                                                                                                                                                    | 12 |
| 226 | C <sub>40</sub> H <sub>46</sub> NO <sub>18</sub> | 828.2715 | 828 | 271.50 |                                                                                                                                                                                  | 14 |
| 227 | C <sub>39</sub> H <sub>48</sub> O <sub>20</sub>  | 836.2739 | 836 | 273.90 | demethylanhydroicaritin-7-O-glc-3-O-acetylated rha-xyl                                                                                                                           | 24 |
| 228 | C <sub>39</sub> H <sub>48</sub> O <sub>21</sub>  | 836.2739 | 836 | 273.90 |                                                                                                                                                                                  | 14 |
| 229 | C <sub>39</sub> H <sub>48</sub> O <sub>21</sub>  | 836.2739 | 836 | 273.90 |                                                                                                                                                                                  | 31 |
| 230 | C <sub>39</sub> H <sub>48</sub> O <sub>21</sub>  | 836.2739 | 836 | 273.90 |                                                                                                                                                                                  | 31 |
| 231 | C <sub>39</sub> H <sub>48</sub> O <sub>21</sub>  | 836.2739 | 836 | 273.90 | anhydroicaritin-3-O-rha-glcucronic acid-7-O-glc                                                                                                                                  | 24 |
| 232 | C <sub>39</sub> H <sub>50</sub> O <sub>20</sub>  | 838.2895 | 838 | 289.50 | hexandraside F                                                                                                                                                                   | 3  |
| 233 | C <sub>39</sub> H <sub>50</sub> O <sub>20</sub>  | 838.2895 | 838 | 289.50 | 3'-hydroxycariine-3-di-O-rha-7-O-glc                                                                                                                                             | 24 |
| 234 | C <sub>39</sub> H <sub>50</sub> O <sub>20</sub>  | 838.2895 | 838 | 289.50 | hexandraside F isomer                                                                                                                                                            | 24 |
| 235 | C <sub>39</sub> H <sub>50</sub> O <sub>20</sub>  | 838.2895 | 838 | 289.50 | sagittasine B                                                                                                                                                                    | 3  |
| 236 | C <sub>39</sub> H <sub>50</sub> O <sub>20</sub>  | 838.2895 | 838 | 289.50 | epimedin A                                                                                                                                                                       | 25 |
| 237 | C <sub>39</sub> H <sub>50</sub> O <sub>20</sub>  | 838.2895 | 838 | 289.50 | hexandraside F                                                                                                                                                                   | 18 |
| 238 | C <sub>39</sub> H <sub>50</sub> O <sub>20</sub>  | 838.2895 | 838 | 289.50 | epimedin A isomer                                                                                                                                                                | 2  |
| 239 | C <sub>39</sub> H <sub>50</sub> O <sub>20</sub>  | 838.2895 | 838 | 289.50 | morphoside B                                                                                                                                                                     | 2  |
| 240 | C <sub>39</sub> H <sub>50</sub> O <sub>20</sub>  | 838.2895 | 838 | 289.50 | sagittasine A                                                                                                                                                                    | 2  |
| 241 | C <sub>39</sub> H <sub>50</sub> O <sub>20</sub>  | 838.2895 | 838 | 289.50 | 3'-hydroxycariine-3-O-rha-rha-7-O-glc                                                                                                                                            | 3  |
| 242 | C <sub>39</sub> H <sub>50</sub> O <sub>20</sub>  | 838.2895 | 838 | 289.50 | epimedin A isomer                                                                                                                                                                | 28 |
| 243 | C <sub>38</sub> H <sub>50</sub> O <sub>21</sub>  | 842.2845 | 842 | 284.50 | dihydrodemethylcaritin-7-O-glc-3-O-glc-glc                                                                                                                                       | 3  |
| 244 | C <sub>40</sub> H <sub>50</sub> O <sub>20</sub>  | 850.2895 | 850 | 289.50 | anhydroicaritin-3-O-rha(OAc)-xyl-7-O-glc                                                                                                                                         | 3  |
| 245 | C <sub>40</sub> H <sub>50</sub> O <sub>20</sub>  | 850.2895 | 850 | 289.50 | anhydroicaritin-3-O-rha-7-O-glc-xyl(OAc)                                                                                                                                         | 3  |
| 246 | C <sub>40</sub> H <sub>50</sub> O <sub>20</sub>  | 850.2895 | 850 | 289.50 | anhydroicaritin-3-O-rha(OAc)-xyl-7-O-glc isomer                                                                                                                                  | 3  |

|     |                                                 |          |     |        |                                                                                                                  |    |
|-----|-------------------------------------------------|----------|-----|--------|------------------------------------------------------------------------------------------------------------------|----|
| 247 | C <sub>40</sub> H <sub>50</sub> O <sub>20</sub> | 850.2895 | 850 | 289.50 | demethylanhydroicaritin-3-O-rha-rha-7-O-glc(OAc)                                                                 | 3  |
| 248 | C <sub>39</sub> H <sub>50</sub> O <sub>21</sub> | 854.2845 | 854 | 284.50 |                                                                                                                  | 28 |
| 249 | C <sub>41</sub> H <sub>52</sub> O <sub>20</sub> | 864.3052 | 864 | 305.20 | anhydroicaritin-3-O-rha-rha-7-O-glc(OAc)                                                                         | 3  |
| 250 | C <sub>40</sub> H <sub>50</sub> O <sub>21</sub> | 866.2845 | 866 | 284.50 | demethylanhydroicaritin-3-O-rha-glc(OAc)-7-O-glc                                                                 | 3  |
| 251 | C <sub>41</sub> H <sub>52</sub> O <sub>21</sub> | 880.3001 | 880 | 300.10 | korepimidoside C                                                                                                 | 11 |
| 252 | C <sub>41</sub> H <sub>52</sub> O <sub>21</sub> | 880.3001 | 880 | 300.10 | epimedin I                                                                                                       | 2  |
| 253 | C <sub>41</sub> H <sub>52</sub> O <sub>21</sub> | 880.3001 | 880 | 300.10 | anhydroicaritin-3-O-rha(1-4OAc)-7-O-(1-3)glc                                                                     | 3  |
| 254 | C <sub>42</sub> H <sub>52</sub> O <sub>21</sub> | 892.3001 | 892 | 300.10 | sempervirenoside A                                                                                               | 41 |
| 255 | C <sub>42</sub> H <sub>52</sub> O <sub>21</sub> | 892.3001 | 892 | 300.10 | demethylcaritin-3-O- (6''-O-acetyl)-glc -(1-3) -O- ( 4''-O-acetyl)-rha-7-O-glc                                   | 4  |
| 256 | C <sub>42</sub> H <sub>52</sub> O <sub>21</sub> | 892.3001 | 892 | 300.10 | epimedokoreanoside III                                                                                           | 42 |
| 257 | C <sub>42</sub> H <sub>52</sub> O <sub>22</sub> | 908.2950 | 908 | 295.00 | demethylcaritin-3-O-(6''-O-acetyl)-glc-(1-3)- O-(4''-O-acetyl) -rha-7-O-glc                                      | 18 |
| 258 | C <sub>42</sub> H <sub>52</sub> O <sub>22</sub> | 908.2950 | 908 | 295.00 | 8-(3, 3-dimethylallyl)-4', 5, 7-trihydroxyflavonol 3-[O-6-O-acetyl-β-D-glc-(1→3)-4-O-acetyl-α-L-rha] 7-(β-D-glc) | 2  |
| 259 | C <sub>42</sub> H <sub>52</sub> O <sub>22</sub> | 908.2950 | 908 | 295.00 | demethylanhydroicaritin-3-O-rha(OAc)-glc(OAc)-7-O-glc                                                            | 3  |
| 260 | C <sub>43</sub> H <sub>54</sub> O <sub>22</sub> | 922.3107 | 922 | 310.70 | caohuoside E                                                                                                     | 2  |
| 261 | C <sub>43</sub> H <sub>54</sub> O <sub>22</sub> | 922.3107 | 922 | 310.70 | epimedokoreanoside I                                                                                             | 2  |
| 262 | C <sub>43</sub> H <sub>54</sub> O <sub>22</sub> | 922.3107 | 922 | 310.70 | epimedokoreanoside I isomer                                                                                      | 3  |
| 263 | C <sub>43</sub> H <sub>54</sub> O <sub>22</sub> | 922.3107 | 922 | 310.70 | epimedokoreanoside I isomer                                                                                      | 3  |
| 264 | C <sub>44</sub> H <sub>54</sub> O <sub>23</sub> | 950.3056 | 950 | 305.60 | demethylanhydroicaritin-3-O-rha(2OAc)-glc(OAc)-7-O-glc                                                           | 3  |
| 265 | C <sub>44</sub> H <sub>54</sub> O <sub>23</sub> | 950.3056 | 950 | 305.60 | demethylanhydroicaritin-3-O-rha(2OAc)-glc(OAc)-7-O-glc isomer                                                    | 3  |
| 266 | C <sub>44</sub> H <sub>58</sub> O <sub>23</sub> | 954.3369 | 954 | 336.90 |                                                                                                                  | 28 |
| 267 | C <sub>44</sub> H <sub>58</sub> O <sub>25</sub> | 954.3369 | 954 | 336.90 | demethylanhydroicaritin-3-O-rha-glc-7-O-sophoroside                                                              | 3  |
| 268 | C <sub>45</sub> H <sub>56</sub> O <sub>23</sub> | 964.3212 | 964 | 321.20 | korepimidoside B                                                                                                 | 43 |
| 269 | C <sub>45</sub> H <sub>56</sub> O <sub>23</sub> | 964.3212 | 964 | 321.20 | epimedin K                                                                                                       | 2  |
| 270 | C <sub>45</sub> H <sub>56</sub> O <sub>23</sub> | 964.3212 | 964 | 321.20 | epimedin L                                                                                                       | 2  |
| 271 | C <sub>45</sub> H <sub>56</sub> O <sub>23</sub> | 964.3212 | 964 | 321.20 | caohuoside A                                                                                                     | 3  |
| 272 | C <sub>45</sub> H <sub>56</sub> O <sub>23</sub> | 964.3212 | 964 | 321.20 | caohuosideB                                                                                                      | 3  |
| 273 | C <sub>45</sub> H <sub>56</sub> O <sub>23</sub> | 964.3212 | 964 | 321.20 | korepimidoside C or isomer                                                                                       | 3  |
| 274 | C <sub>45</sub> H <sub>56</sub> O <sub>23</sub> | 964.3212 | 964 | 321.20 | epemedin L isomer                                                                                                | 14 |
| 275 | C <sub>45</sub> H <sub>60</sub> O <sub>23</sub> | 968.3525 | 968 | 352.50 | anhydroicaritin-3-O-rha-rha-7-O-rha-glc                                                                          | 3  |
| 276 | C <sub>45</sub> H <sub>60</sub> O <sub>24</sub> | 984.3475 | 984 | 347.50 | acuminatin                                                                                                       | 2  |
| 277 | C <sub>45</sub> H <sub>60</sub> O <sub>24</sub> | 984.3475 | 984 | 347.50 | acuminatoside                                                                                                    | 24 |

## References

1. Wang, M.Q.; Peng, X.; Gan, Q.F. Studies on chemical constituents of *Epimedium brevicornum* Maxim. *Res. Pract. Chin. Med.* **2005**, (02), 39-42.
2. Yuan, H.; Cao, S.P.; Chen, S.Y.; Guo, L.N.; Zheng, J.; Lin, R.C. Research progress on chemical constituents and quality control of *Epimedium Folium*. *Chin. Tradit. Herb. Drugs.* **2014**, 45(24), 3630-3640.
3. Zhao, H.Y.; Sun, J.H.; Fan, M.X.; Fan, L.; Zhou, L.; Li, Z.; Han, J.; Wang, B.R.; Guo, D.A. Analysis of phenolic compounds in *Epimedium* plants using liquid chromatography coupled with electrospray ionization mass spectrometry. *J.Chromatogr.A.* **2008**, 1190,157-181.
4. Lv, L.; Zhang, H.; Zhao, L.; Jia, J.; Li, Y.Y.; Zhang, G.Q. RRLC-TOF/MS in rapid identification of 43 chemical constituents of *epimedium*. *Acad. J. Second Mil. Med. Univ.* **2011**, 32(03), 306-310.
5. Seelinger, G.; Merefot, I.; Schempp, C.M. Anti-oxidant, anti-inflammatory and anti-allergic activities of luteolin. *Planta. Med.* **2008**, 74(14), 1667-1677.
6. Huang, Y.L.; Ou, J.C.; Chen, C.F.; Chen, C.C. Three new 2-phenoxychromones from the leaves of *Epimedium Sagittatum*. *J. Nat. Prod.* **1993**, 56(2), 275-278.
7. Hartwig, U.A.; Maxwell, C.A.; Joseph, C.M.; Phillips, D.A. Chrysoeriol and luteolin released from alfalfa seeds induce nod genes in rhizobium meliloti. *Plant Physiol.* **1990**, 92, 116-122.

8. Jiao, J.J.; Zhang, Y.; Liu, C.M.; Liu, J.E.; Wu, X.Q.; Zhang, Y. Separation and purification of triclin from an antioxidant product derived from bamboo leaves. *J. Agric. Food. Chem.* **2007**, *55*, 10086-10092.
9. Horio, T.; Kawabata, Y.; Takayama, T.; Tahara, S.; Kawabata, J.; Fukushi, I.Y.; Nishimura, H.; Mizutanil, J. A potent attractant of zoospores of aphanomyces cochlioides isolated from its host, *Spinacia oleracea*. *Experientia.* **1992**, *48*, 410-414.
10. Chen, C.C.; Huang, Y.L.; Sun, C.M.; Shen, C.C. New prenylflavones from the leaves of *Epimedium sagittatum*. *J. Nat. Prod.* **1996**, *59*, 412-414.
11. Sun, P.Y.; Wen, Y.; Xu, Y.; Pei, Y.P.; Chen, Y.J.; Shimizu, N.; Takeda, T. The chemical constituents of *Epimedium Koreanum* Nakai. *Acta Pharm. Sin. B.* **1998**, *33(12)*, 919-922.
12. Li, W.K.; Pan, J.Q.; Lv, M.J.; Zhang, R.Y.; Liao, M.C.; Xiao, P.G. Separation and structure of epimedokoreanin D. *Acta Pharm. Sin. B.* **1996**, *31(1)*, 29-32.
13. Chen, C.C.; Tsai, P.C.; Wei, B.L.; Chiob, W.F. 8-Prenylkaempferol suppresses inducible nitric oxide synthase expression through interfering with JNK-mediated AP-I pathway in murine macrophages. *Eur. J. Pharmacol.* **2008**, *590(1-3)*, 430-436.
14. Wang, Y.Q.; Guo, Z.M.; Jin, Y.; Zhang, X.L.; Wang, L.; Xue, X.Y.; Liang, X.M. Identification of prenyl flavonoid glycosides and phenolic acids in *Epimedium koreanum* Nakai by Q-TOF-MS combined with selective enrichment on "click oligo (ethylene glycol)" column. *J. Pharm. Biomed. Anal.* **2010**, *51(3)*, 606-616.
15. Jin, Q.H.; Lee, C.; Lee, J.W.; Yeon, E.T.; Lee, D.; Han, S.B.; Hong, J.T.; Kim, Y.; Lee, M.K.; Hwang, B.Y. 2-Phenoxychromones and prenylflavonoids from *Epimedium koreanum* and their inhibitory effects on LPS-induced nitric oxide and interleukin-1 $\beta$  production. *J. Nat. Prod.* **2014**, *77(7)*, 1724-1728.
16. Li, H.F.; Guan, X.Y.; Yang, W.Z.; Liu, K.D.; Ye, M.; Sun, C.; Lu, S.; Guo, D.A. Antioxidant flavonoids from *Epimedium wushanense*. *Fitoterapia.* **2012**, *83(1)*, 44-48.
17. Sun, P.Y.; Chen, Y.; Shimizu, N.; Takeda, T. Studies on the constituents of *epimedium koreanum* III. *Chem. Pharm. Bull.* **1998**, *46(2)*, 355-358.
18. Gan, J.S.; Ma, Y.; Wang, Z.Y.; Liu, X.S.; Liu, Y. Analysis on chemical constituents of *Epimedium Herba* by UPLC-Q-TOF-MS. *Drugs & Clinic.* **2014**, *29(04)*, 349-352.
19. Guo, B.L.; Li, W.K.; Yu, J.G.; Xiao, P.G. A flavonol from *Epimedium Brevicornum*. *Phytochemistry.* **1996**, *41(3)*, 991-992.
20. Wang, G.; Wang, C.Y.; Zhang, B.J.; Tian, Y. Tan, S.G.; Liu, T.X.; Sa, D.; Hou, J.; Peng, J.Y.; Yao, J.H.; Ma, X.C. Rapid separation of flavonoids from hydrolysis products of *Epimedium koreanum*. *J. Liq. Chromatogr. Relat. Technol.* **2013**, *36*, 1163-1176.
21. Cui, X.L.; Deng, L.L.; Huang, S.Y. Studies on chemical constituents in chloroform extraction of *Epimedium sagittatum*. *Chin. J. Exp. Tradit. Med. Formulae.* **2010**, *16(13)*, 101-103.
22. Nakashima, K.; Miyashita, H.; Yoshimitsu, H.; Fujiwara, Y.; Nagai, R.; Ikeda, T. Two new prenylflavonoids from *Epimedium Herba* and their inhibitory effects on advanced glycation end-products. *J. Nat. Med.* **2010**, *70(2)*, 290-295.
23. Hong, X.; Wang, X.C.; Yong, E.L.; Gong, Y.H. Determination of breviflavone A and B in *Epimedium* herbs with liquid chromatography-tandem mass spectrometry. *J Pharm Biomed Anal.* **2009**, *49(3)*, 853-857.
24. Yu, X.E.; Qin, J.P.; Li, J.C.; Huang, W.Z.; Wang, Z.Z.; Xiao, W. Rapid analysis on chemical constituents in Yinyanghuo Zong-huangtong capsule by UPLC/Q-TOF-MS/MS. *China J. Chin. Mater. Med.* **2008**, *590(1-3)*, 430-436.
25. Wang, Y.; Yuan, L.; Li, Y.B.; Zhang, Y.J. Analysis on chemical constituents of *Epimedium Folium* by UPLC-Q-TOF-MS. *Chin. Tradit. Herb. Drugs.* **2017**, *48(13)*, 2625-2631.
26. Li, W.K.; Zhang, R.Y.; Xiao, P.G. The structure of epimedokoreanin B and epimedokoreanin C. *Acta Pharm. Sin. B.* **1994**, *29(11)*, 835-839.
27. Toshio, F.; Taro, N. Seven prenylated flavonol glycosides from two *Epimedium* species. *Phytochemistry.* **1988**, *27(1)*, 259-266.
28. Wu, C.S.; Zhang, J.L.; Zhou, T.H.; Guo, B.L.; Wang, Y.L.; Hou, J.F. Simultaneous determination of seven flavonoids in dog plasma by ultra-performance liquid chromatography-tandem mass spectrometry and its application to a bioequivalence study of bioactive components in *Herba Epimedium* and *Er-Xian* Decoction. *J. Pharm. Biomed. Anal.* **2011**, *54(1)*, 186-191.
29. Li, W.K.; Xiao, P.G.; Liao, M.C.; Zhang, R.Y. The structure of a new flavonoid glycoside from *Epimedium Koreanum* Nakai. *Chem. J. Chin. Univ.* **1995**, *16(10)*, 1575-1576.
30. Li, H. M.; Zhou, C.; Chen, C.H.; Li, R.T.; Lee, K.H. Flavonoids isolated from heat-processed *Epimedium Koreanum* and their anti-HIV-1 activities. *Helv. Chim. Acta.* **2015**, *98*, 1177-1187.
31. Pilepić, K.H.; Yang, Z.L.; Chen, J.; Chen, X.Q.; Wang, Y.; Zhao, J.; Mihajević, S.; Li, S. P. Flavonoids in natural and tissue cultured materials of *Epimedium alpinum* identified by using UHPLC-Q-TOF-MS/MS. *Int. J. Mass Spectrom.* **2018**, *434*, 222-232.
32. Li, W.K.; Xiao, P.G.; Zhang, R.Y. A difuranoflavone from *Epimedium Koreanum*. *Phytochemistry.* **1995**, *38(3)*, 807-808.
33. Mizuo, M.; Munekazu, I.; Toshiyuki, T.; Norio, S. New flavonol glycoside from the leaves of *Epimedium sempervirens*. *J. Nat. Prod.* **1990**, *53(3)*, 744-746.
34. Yu, C.Y.; Song, L.N.; Chen, G. Two new prenylflavonoids from *Epimedium sutchuenense*. *Chin. Chem. Lett.* **2009**, *20(7)*, 842-844.
35. Yan, W.M.; Fu, Y.; Ma, Y.; Li, Y.W.; Zhang, X.Z.; Xin, F. Studies on flavones of *Epimedium bevicorum* Maxim. *China J. Chin. Mater. Med.* **1998**, *23(12)*, 31-32+59.

36. Li, F.; Liu, A.F. Studies on the isolation and structures of baohuoside II, III, IV and V. *Acta Pharm. Sin. B.* **1988**, *23*(29), 672-681.
37. Mizuo, M.; Munekazu, I.; Toshiyuki, T.; Norio, S.; Hirobumi, Y. Sutchuenoside A: a new kaempferol glycoside from the aerial parts of *Epimedium sutchuenense*. *J. Nat. Prod.* **1991**, *54*(5), 1427-1429.
38. Wang, G.J.; Tsai, T.H.; Lin, L.C. Prenylflavonol, acylated flavonol glycosides and related compounds from *Epimedium sagittatum*. *Phytochemistry.* **2007**, *68*, 2455-2464.
39. Sun, P.Y.; Chen, Y.J.; Wen, Y.; Pei, Y.P.; Liu, Z.H.; Yao, X.S.; Takeda, T.; Ogihara, Y. Structure determination of korepimedoside A and korepimedoside B from *Epimedium koreanum* Nakai. *Acta Pharm. Sin. B.* **1996**, *31*(8), 602-606.
40. Yang, W.Z.; Qiao, X.; Bo, T.; Wang, Q.; Guo, D.A.; Ye, M. Low energy induced homolytic fragmentation of flavonol 3-O-glycosides by negative electrospray ionization tandem mass spectrometry. *Rapid. Commun. Mass Spectrom.* **2014**, *28*(4), 385-395.
41. Mizuo, M.; Munekazu, I.; Toshiyuki, T.; Norio, S.; Tsutomu, N.; Akakira, I.M. A novel flavonol glycoside in the leaves of *Epimedium sempervirens*. *Chem. Pharm. Bull.* **1989**, *37*(8), 2241-2242.
42. Xiang, D.S.; Li, W.; Ji, E.K.; Seo, Y.Y.; Jlin, Y.M.; Young, H.K. Prenyl-flavonoids from *Epimedium koreanum* Nakai and their soluble epoxide hydrolase and tyrosinase inhibitory activities. *Med. Chem. Res.* **2017**, *26*(11), 2761-2767.
43. Li, J.Y.; Li, H.M.; Liu, D.; Chen, X.Q.; Chen, C.H.; Li, R.T. Three new acylated prenylflavonol glycosides from *Epimedium koreanum*. *Phytochem. Lett.* **2016**, *17*, 206-212.
